# Supplementary material for: MicroRNA-204-5p inhibits invasion and metastasis of laryngeal squamous cell carcinoma by suppressing forkhead box C1
Source: PubMed Central journal article supplement — J Cancer. 2017 Jul 21;8(12):2356–68. doi: 10.7150/jca.19470 (PMC5560155; doi:10.7150/jca.19470), 2017-07-21
Supplement: jcav08p2356s1.pdf [file jcav08p2356s1.pdf]

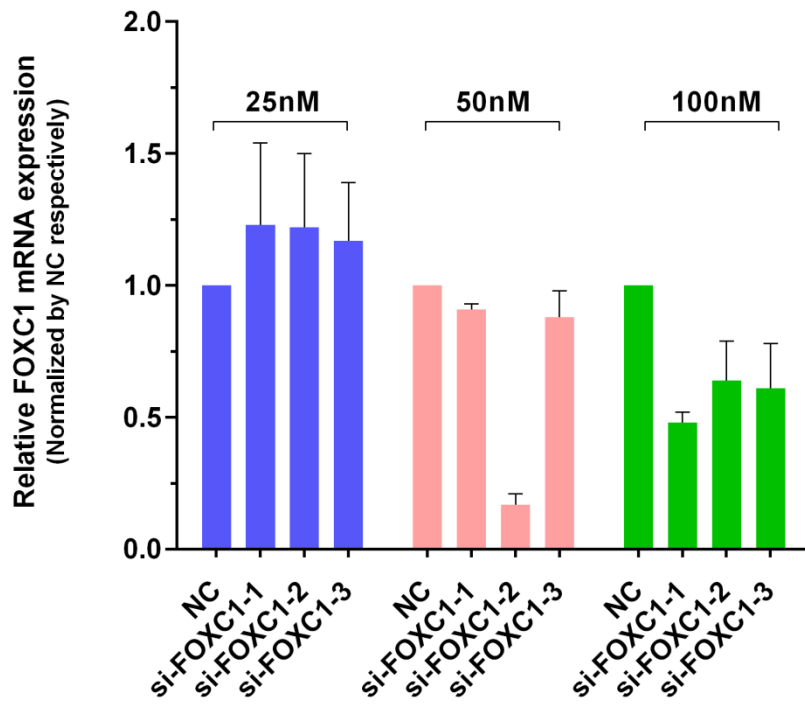

Figure S1. qRT-PCR screening of effective FOXC1 siRNA (si-FOXC1). Hep-2 cells were transfected with siRNAs targeting different region of FOXC1 mRNA at the indicated concentrations. After 48 h transfection, the relative expression of FOXC1 was determined by qRT-PCR and was calculated by the  $2^{-\Delta\Delta ct}$  method (normalized to the NC group).

**Table S1. The target sequences of synthetic FOXC1 siRNA (si-FOXC1)**

| Name       | Accession      | Target Seq (sence of 5'-3') | Start Pos | GC%    |
|------------|----------------|-----------------------------|-----------|--------|
| si-FOXC1-1 | NM_001453      | ATCAAGACCGAGAACGGTAtt       | 674       | 47.37% |
| si-FOXC1-2 | NM_001453      | CGGACAAGAAGATCACCCtTt       | 282       | 52.63% |
| si-FOXC1-3 | NM_001453      | GCTTTCGTCTACGACTGTAtt       | 1631      | 47.37% |
| si-NC      | siN05815122147 | TTCTCCGAACGTGTCACGT         |           | 50.0%  |

**Table S2. Primers for generating the wild-type and mutated FOXC1 3' UTR reporter constructs base on the psi-CHECK2 vector.**

| No.            | Target Seq                                             |
|----------------|--------------------------------------------------------|
| Wt-Foxc1XhoI-F | 5'-ccg ctcgag CACACCCTCAAAGCCGAACTA-3'                 |
| Wt-Foxc1NotI-R | 5'-ataagaat gcggccgc AAAGTGTATTTATTTGCAGCAATC-3'       |
| Mut-Foxc1-1-F  | 5'-TGCTTTTTTCTCATTATAATTTCCCTAACTGTATTAATCTTATTCTAT-3' |
| Mut-Foxc1-1-R  | 5'-ATAGAATAAGATTAATACAGTTAGGGAAATTATAATGAGAAAAAAGCA-3' |
| Mut-Foxc1-2-F  | 5'-AAAATATACTGCGGGTTGGTTTCCCTTATTTAATCTTTGAGAACTATT-3' |
| Mut-Foxc1-2-R  | 5'-AATAGTTTCTCAAAGATTAATAAGGGAAACCAACCCGCAGTATATTTT-3' |

F: Forward strand; R: Reverse strand.
